# Supplementary material for: Bifunctional Malic/Malolactic Enzyme Provides a Novel Mechanism for NADPH-Balancing in Bacillus subtilis
Source: PubMed Central journal article supplement (PMC8092299; doi:10.1128/mbio.03438-20), 2021-04-06

**Supplementary Figure 3.** Confirmation of ion  $m/z = 89$  in enzyme assay mixture as lactate by MRM analysis ( $89 > 43$  transition) using targeted LC-MS/MS.

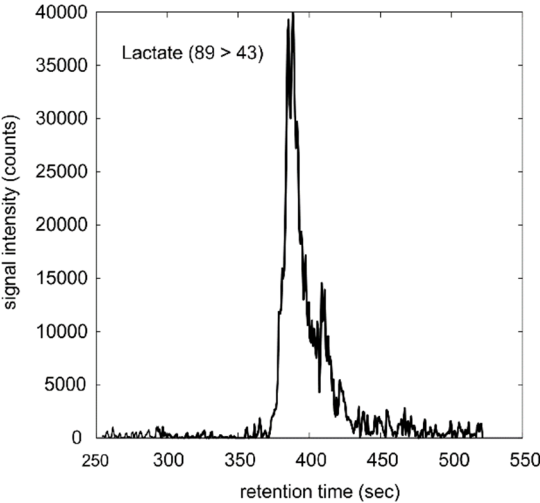

Supplement: mBio.03438-20-sf003.pdf [file mBio.03438-20-sf003.pdf]
