# Supplementary material for: Bifunctional Malic/Malolactic Enzyme Provides a Novel Mechanism for NADPH-Balancing in Bacillus subtilis
Source: PubMed Central journal article supplement (PMC8092299; doi:10.1128/mbio.03438-20), 2021-04-06
Supplement: mBio.03438-20-st001.pdf [file mBio.03438-20-st001.pdf]

**Supplementary Table 1. Physiological parameters of the six *B. subtilis* strains used in this study.** The mean values and standard deviations were determined from at least duplicate experiments.

| Strain | Genotype        | Growth rate (h <sup>-1</sup> ) | Glucose uptake rate (mmol g <sup>-1</sup> h <sup>-1</sup> ) | Acetate secretion rate (mmol g <sup>-1</sup> h <sup>-1</sup> ) | Yield (gCDW/g glucose) |
|--------|-----------------|--------------------------------|-------------------------------------------------------------|----------------------------------------------------------------|------------------------|
| 168CA  | wild-type       | 0.51 ± 0.02                    | 8.91 ± 1.4                                                  | 3.22 ± 0.70                                                    | 0.32                   |
| GM1608 | ΔytsJ           | 0.44 ± 0.02                    | 6.06 ± 0.79                                                 | 2.75 ± 0.35                                                    | 0.40                   |
| GTD102 | ΔmaeA           | 0.47 ± 0.03                    | 8.07 ± 0.99                                                 | 3.30 ± 0.31                                                    | 0.32                   |
| GTD110 | ΔmalS           | 0.46 ± 0.02                    | 7.56 ± 0.71                                                 | 3.69 ± 0.25                                                    | 0.34                   |
| GM1632 | ΔmleA           | 0.44 ± 0.03                    | 7.39 ± 1.20                                                 | 3.59 ± 0.40                                                    | 0.33                   |
| GM1655 | ΔmaeAΔmalSΔmleA | 0.42 ± 0.01                    | 7.46 ± 1.42                                                 | 3.23 ± 0.64                                                    | 0.31                   |
