# Supplementary material for: Bifunctional Malic/Malolactic Enzyme Provides a Novel Mechanism for NADPH-Balancing in Bacillus subtilis
Source: PubMed Central journal article supplement (PMC8092299; doi:10.1128/mbio.03438-20), 2021-04-06
Supplement: mBio.03438-20-st002.pdf [file mBio.03438-20-st002.pdf]

**Supplementary Table 2. Enzymatic parameters of the four *B. subtilis* malic enzyme.**  $K_m$  values are provided in mM,  $k_{cat}$  values in  $s^{-1}$ . The mean values and standard deviation were determined with at least 2 replicates.

| Protein | Pyruvate <sup>a</sup> |           | NADH <sup>a</sup> |           | NADPH <sup>a</sup> |           | Malate <sup>b</sup> |           | NAD <sup>+b</sup> |           | NADP <sup>+b</sup> |           |
|---------|-----------------------|-----------|-------------------|-----------|--------------------|-----------|---------------------|-----------|-------------------|-----------|--------------------|-----------|
|         | $K_m$                 | $k_{cat}$ | $K_m$             | $k_{cat}$ | $K_m$              | $k_{cat}$ | $K_m$               | $k_{cat}$ | $K_m$             | $k_{cat}$ | $K_m$              | $k_{cat}$ |
| MaeA    | nd <sup>c</sup>       | nd        | nd                | nd        | nd                 | nd        | 1.55                | 54        | 2.80              | 3         | 0.055              | 4         |
| MaIS    | nd                    | nd        | nd                | nd        | nd                 | nd        | 1.56                | 47        | 1.00              | 9         | nd                 | nd        |
| MleA    | nd                    | nd        | nd                | nd        | nd                 | nd        | 3.52                | 56        | 5.50              | 495       | 7.3                | 66        |
| YtsJ    | 5.3±1.3               | 4.3±0.4   | nd                | nd        | 0.8±0.5            | 7.8±2.7   | 3.95                | 75        | 5.30              | 159       | 6.7                | 54        |

<sup>a</sup> this study

<sup>b</sup> Lerondel et al. (2006). The maximal deviation from the mean was less than 10%<sup>8</sup>.

<sup>c</sup> not detected
