# Supplementary material for: Bifunctional Malic/Malolactic Enzyme Provides a Novel Mechanism for NADPH-Balancing in Bacillus subtilis
Source: PubMed Central journal article supplement (PMC8092299; doi:10.1128/mbio.03438-20), 2021-04-06
Supplement: mBio.03438-20-st003.pdf [file mBio.03438-20-st003.pdf]

**Supplementary Table 3. *B. subtilis* strains used in this study**

| Strain | Genotype                                                                           | Source or reference                  |
|--------|------------------------------------------------------------------------------------|--------------------------------------|
| 168CA  | wild-type, <i>trpC2</i>                                                            | Laboratory stock                     |
| GM1608 | <i>ytsJ'</i> ::[pMUTIN2 $\Delta$ ( <i>lacZ-ery</i> ):: <i>kan</i> ]                | (Lerondel et al., 2006) <sup>8</sup> |
| GTD102 | <i>maeA'</i> :: <i>kan</i>                                                         | (Doan et al., 2003) <sup>42</sup>    |
| GTD110 | $\Delta$ <i>malS'</i> :: <i>spc</i>                                                | (Doan et al., 2003) <sup>42</sup>    |
| GM1632 | <i>mleA'</i> :: <i>cat</i>                                                         | (Lerondel et al., 2006) <sup>8</sup> |
| GM1655 | <i>maeA</i> :: <i>pEC23 (kan) malS</i> :: <i>spec mleA</i> :: <i>pMutin3 (ery)</i> | (Lerondel et al., 2006) <sup>8</sup> |
