# Supplementary material for: Bifunctional Malic/Malolactic Enzyme Provides a Novel Mechanism for NADPH-Balancing in Bacillus subtilis
Source: PubMed Central journal article supplement (PMC8092299; doi:10.1128/mbio.03438-20), 2021-04-06
Supplement: mBio.03438-20-st004.pdf [file mBio.03438-20-st004.pdf]

**Supplementary Table 4. Physiological concentrations of metabolites involved in the malic enzyme reaction in *B. subtilis*.**

| <b>metabolite</b> | <b>Concentration (mM)</b> | <b>Standard deviation</b> |
|-------------------|---------------------------|---------------------------|
| Malate            | 0.57 <sup>a</sup>         | 0.14                      |
| Pyruvate          | 8.90 <sup>a</sup>         | 5.75                      |
| NAD <sup>+</sup>  | 1.09 <sup>b</sup>         | 0.52                      |
| NADH              | 0.43 <sup>b</sup>         | 0.21                      |
| NADP <sup>+</sup> | 0.19 <sup>b</sup>         | 0.14                      |
| NADPH             | 0.36 <sup>b</sup>         | 0.25                      |

<sup>a</sup> Estimates from Kleijn et. al. (2010)<sup>25</sup>. <sup>b</sup> Concentrations calculated from the determined cofactor ratios in Fuhrer et al. (2009)<sup>14</sup> and absolute pool sizes of combined NAD<sup>+</sup>/NADH and NADP<sup>+</sup>/NADPH<sup>25</sup>.
